# Supplementary material for: Fully atomistic molecular dynamics modeling of photoswitchable azo-PC lipid bilayers: structure, mechanical properties, and drug permeation
Source: Royal Society of Chemistry journal article supplement (doi:10.1039/d4nr02509a), 2024-12-04
Supplement: d4nr02509a2.pdf [file d4nr02509a2.pdf]

The provided "azopc.tar" archive contains all the files needed to run MD simulations using NAMD. The contents of this archive can be extracted using the command: tar -xvf azopc.tar.

The azo-PC unit cell contains 64 lipids per leaflet for a total of 128 lipids and TIP3P water.

Files contained in azopc.tar

namdinput\_cis\_azopc.conf: Configuration file for the pure cis solvated bilayer

namdinput\_trans\_azopc.conf: Configuration file for the pure trans solvated bilayer

azopc\_sol.psf: Protein structure file for the azo-PC bilayer unit cell

trans\_azopc\_sol\_eq.pdb: Equilibrated structure of the pure trans solvated bilayer in PDB format

cis\_azopc\_sol\_eq.pdb: Equilibrated structure of the pure cis solvated bilayer in PDB format

azopc.pdb: Atomic coordinates for a single azo-PC lipid molecule in PDB format

top\_C36\_azoPC\_lipid.rtf: Topology file defining connectivity, atom types, and partial charges for azo-PC lipid

cis.phenol.conf: Configuration file for one molecule of phenol in a cis bilayer system

cis.phenol.pdb: PDB file for one molecule of phenol in a cis bilayer system

cis.phenol.psf: PSF file for one molecule of phenol in a cis bilayer system

trans.phenol.conf: Configuration file for one molecule of phenol in a trans bilayer system

trans.phenol.pdb: PDB file for one molecule of phenol in a trans bilayer system

trans.phenol.psf: PSF file for one molecule of phenol in a trans bilayer system

cis.skf.conf: Configuration file for one molecule of skf in a cis bilayer system

cis.skf.pdb: PDB file for one molecule of skf in a cis bilayer system

cis.skf.psf: PSF file for one molecule of skf in a cis bilayer system

trans.skf.conf: Configuration file for one molecule of skf in a trans bilayer system

trans.skf.pdb: PDB file for one molecule of skf in a trans bilayer system

trans.skf.psf: PSF file for one molecule of skf in a trans bilayer system

Common folder: Force field parameter files
